# Supplementary figures and images for: Impact of the 18F-FDG-PET/MRI on Metastatic Staging in Patients with Hepatocellular Carcinoma: Initial Results from 104 Patients
Source: MDPI journal article supplement (doi:10.3390/jcm10174017), 2021-09-06

Supplementary Figure S1: WB-PET/MRI imaging protocol.

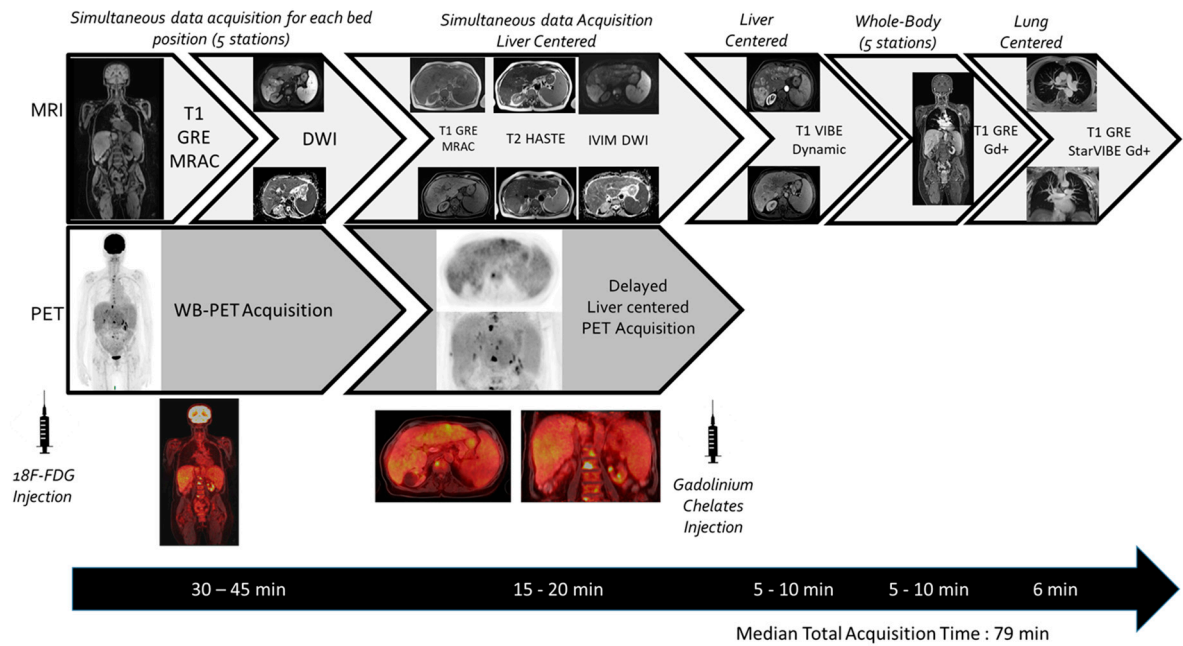

Supplement: s1 [file s1]
